# Supplementary material for: The Role of Oxytocin in Polycystic Ovary Syndrome: A Systematic Review
Source: Preprints.org preprint supplement (doi:10.20944/preprints202404.0810.v1), 2024-04-11
Supplement: Supplementary file 1 [file supplementary]

| Hits | Selection | Comparability | Exposure |
| --- | --- | --- | --- |
| Masrour et al., 2018 | ** | -- | ** |
| Jahromi et al., 2018 | **** | ** | ** |
| Ochsenkühn et al., 2010 | **** | ** | ** |
| Piróg et al., 2023 | *** | ** | ** |

**NEWCASTLE - OTTAWA QUALITY ASSESSMENT SCALE CASE CONTROL STUDIES**

Note: A study can be awarded a maximum of four stars for the Selection and three stars Exposure categories. A maximum of two stars can be given for Comparability.

**NEWCASTLE - OTTAWA QUALITY ASSESSMENT SCALE COHORT STUDIES**

| Hits | Selection | Comparability | Outcome |
| --- | --- | --- | --- |
| Amin et al., 2023 | **** | -- | ** |

Note: A study can be awarded a maximum of six stars for the Selection and three stars Exposure categories. A maximum of two stars can be given for Comparability.

**PICO Worksheet and Search Strategy Protocol**

**1. Define your question using PICO by identifying: Patient/Problem, Intervention, Comparison group and outcome:**

**Patient/Problem:** Patients with Polycystic Ovary syndrome (PCOS)/ PCOS Animal Models

**Intervention:** Hormonal level measurement/ pharmacological treatment

**Comparison:** comparison of the patients/animals with healthy controls

**Outcome:** Treatment effects and /or difference in oxytocin levels

**Write out your question**

**2. Type of question/problem:** The role of oxytocin in PCOS.

**Circle one:** x Therapy/Prevention/Diagnosis/Etiology/Prognosis

**3. Type of studies/publications to include in the search:**

**Check all that apply:**

□ x Meta-analysis □ x Systematic review

□ Clinical practice guidelines □ xRandomized controlled trial

□ xResearch studies or articles □ Case report or series

□ Research report or other grey literature

**4. List main topics and alternate terms from your PICO question that can be used for your search:** “experimental studies”; “women”; “PCOS”; “rats”; “Oxytocin”.

**5. Write out your search strategy:** "polycystic ovary syndrome"[MeSH Terms] OR ("polycystic"[All Fields] AND "ovary"[All Fields] AND "syndrome"[All Fields]) OR "polycystic ovary syndrome"[All Fields]) AND ("oxytocin"[MeSH Terms] OR "oxytocin"[All Fields] OR "oxytocin s [All Fields] OR "oxytocin [All Fields] OR "oxytocin [All Fields]”

Boolean search operators (AND) and (OR).

**6. List any limits that may apply to your search:**

**Gender: Female;**

**Age: Adults;**

**Year(s) of publication:** no limits; Language(s): English

**7. List the databases you will search:** PubMed, Scopus, and Web of Science.

*This form is adapted from: Miller, S.A. (2001). PICO worksheet and search strategy. US National Center for Dental Hygiene Research*
